# Supplementary material
Source: MDPI journal article supplement (https://www.mdpi.com/2072-4292/12/3/429)
Supplement: s1 [file s1]

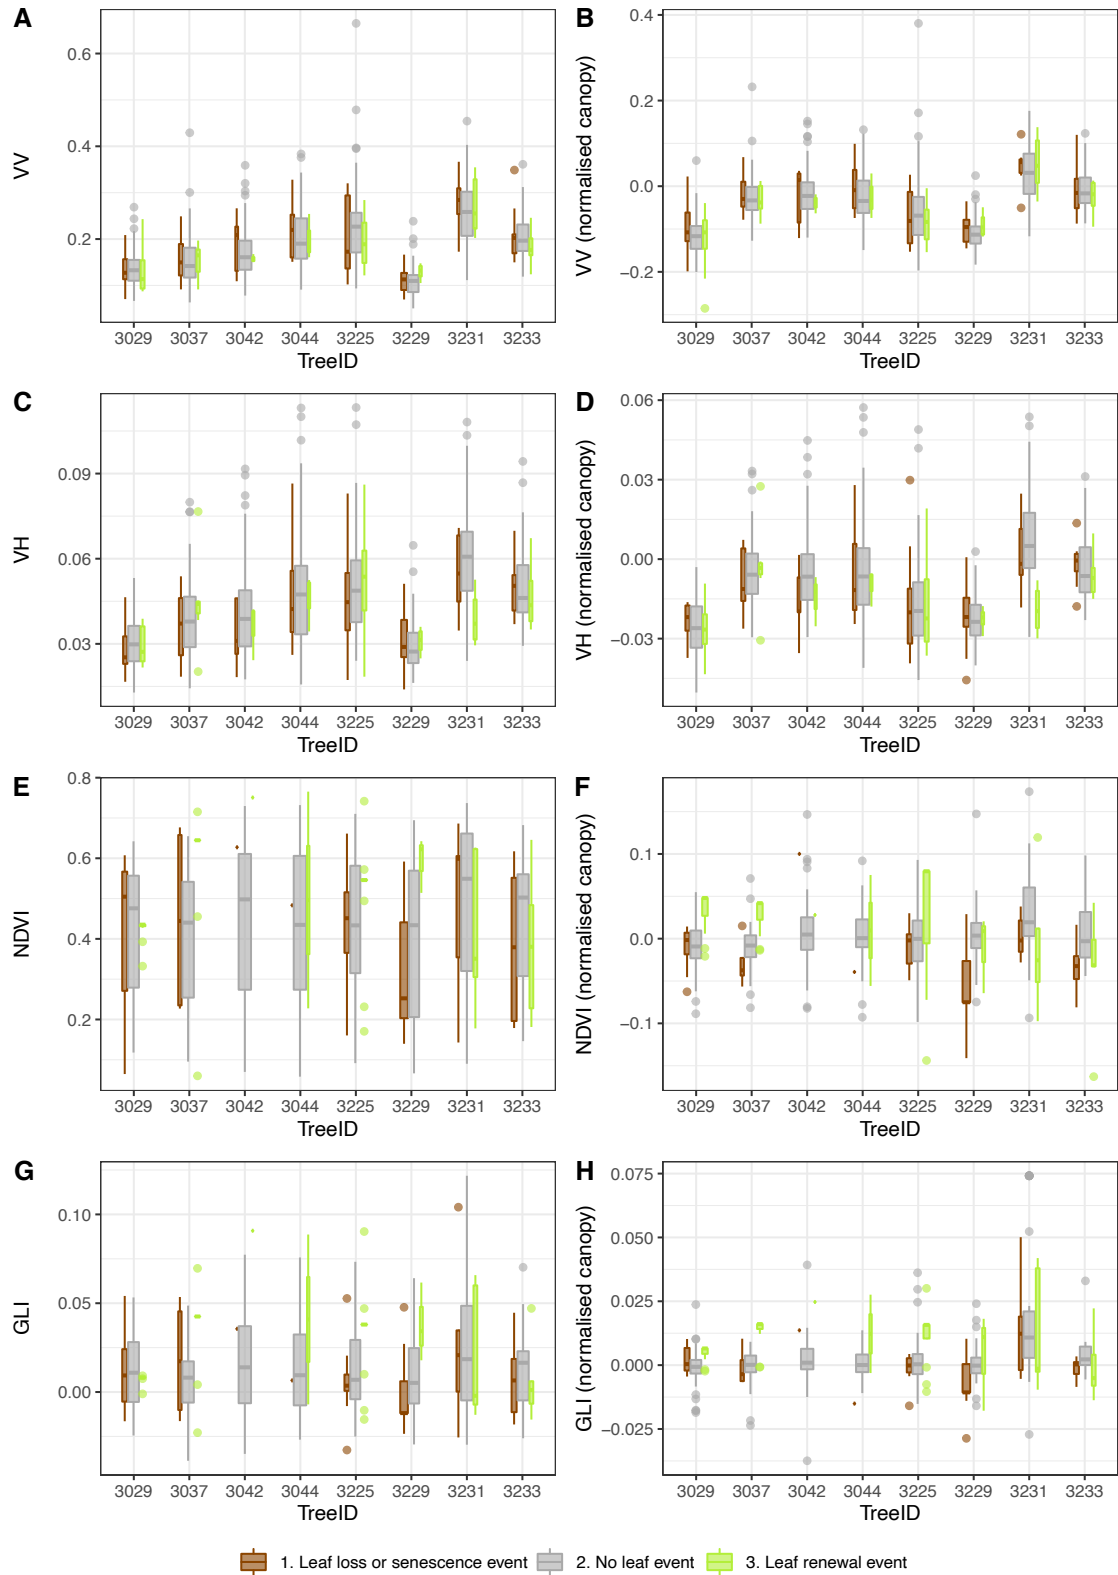

**Figure S5. Boxplots of canopy and normalized canopy data for all satellite data.** A, C, E and G: Boxplots of canopy time series data (mean value of all pixels within canopy at each time step) within each leaf turnover event type. B, D, F and H: Boxplots of normalised canopy time series (difference between mean value of all pixels within canopy and mean value of all pixels in surrounding forest buffer at each time step) within each leaf turnover event type. VV and VH are bands of the Sentinel-1 Synthetic Aperture Radar data and NDVI and GLI are indices derived from Sentinel-2 optical data.
