# Supplementary material
Source: MDPI journal article supplement (https://www.mdpi.com/2072-4292/12/3/429)
Supplement: s1 [file s1]

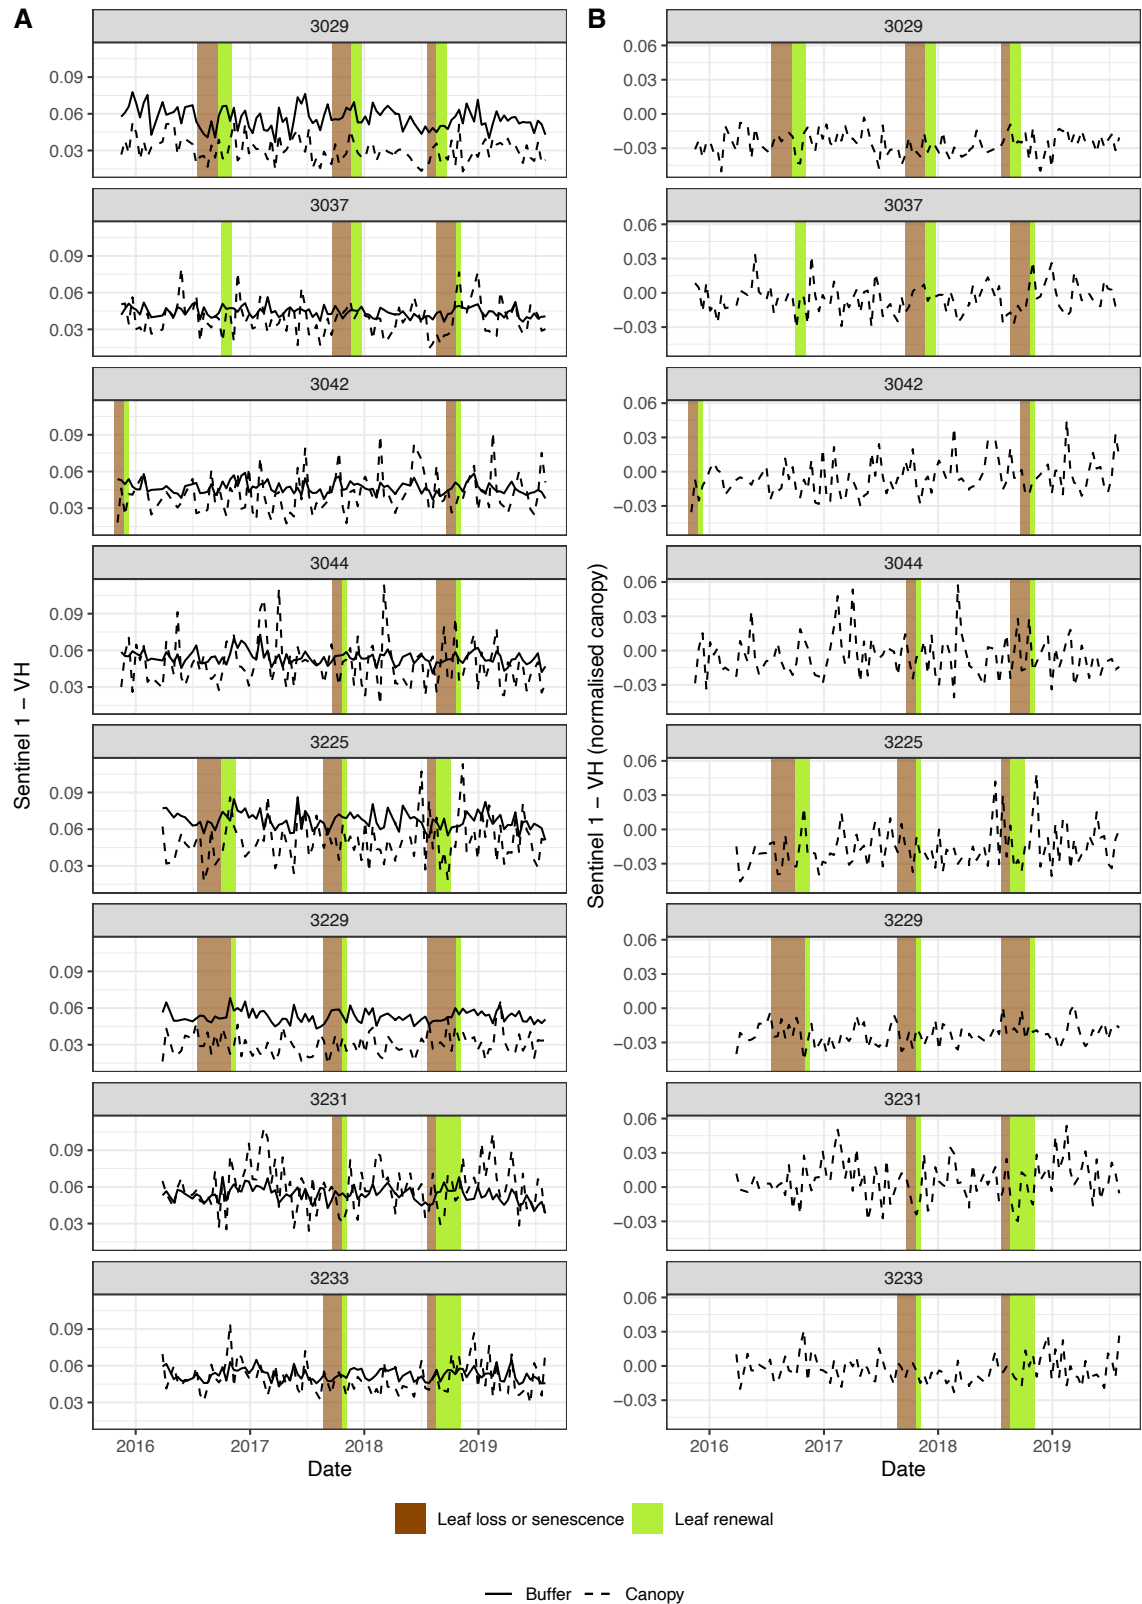

**Figure S2. Focal crown time series for Sentinel-1 VH band.** A. Canopy time series (mean value of all pixels within canopy) and Buffer time series (mean value of all pixels within surrounding 100m forest buffer) per focal crown. B. Normalised canopy time series (difference between mean value of all pixels within canopy and mean value of all pixels in surrounding forest buffer) per focal crown. The brown and green rectangles show the likely periods of either leaf senescence and loss (brown rectangles) or leaf renewal (green rectangles) based on the monthly ground observations as defined in Figure 1.
